# Supplementary material for: Satellite Imagery for Rapid Detection of Liquefaction Surface Manifestations: The Case Study of Türkiye–Syria 2023 Earthquakes
Source: MDPI journal article supplement (doi:10.3390/rs15174190), 2023-08-25
Supplement: s1 [file s1]

Supplementary Material:

# Satellite imagery for rapid detection of liquefaction surface manifestations: the case study of Türkiye-Syria 2023 earthquakes

Maria Taftsoglou <sup>1</sup>, Sotiris Valkaniotis <sup>1</sup>, George Papathanassiou <sup>2,\*</sup> and Efstratios Karantanellis <sup>3</sup>

<sup>1</sup> Department of Civil Engineering, Democritus University of Thrace, University Campus, 671 00 Xanthi, Greece

<sup>2</sup> Department of Geology, Aristotle University of Thessaloniki, 541 24 Thessaloniki, Greece  
Department of Earth and Environmental Sciences, University of Michigan, 1100 North University Avenue, MI 48109-1005, Michigan, USA

\* Correspondence: gpapatha@geo.auth.gr

## Supplementary material content

**Figure S1.** Flooded areas in Hatay province after the February 6<sup>th</sup> 2023 earthquakes. Sentinel-2 pseudo-colour RGB image (band combination B12-B11-B04) from February 12 2023. Flooded areas around Hatay airport in Amik plain and along Orontes river are shown as dark blue colour.

**Figure S2.** Coverage map of Planetscope optical imagery (Planet) used for earthquake triggered liquefaction mapping. Simplified February 6<sup>th</sup> 2023 fault rupture trace shown as black line.

**Figure S3.** Coverage map of Very High Resolution (VHR) optical imagery (Maxar Open Data) used for earthquake triggered liquefaction mapping. Simplified February 6<sup>th</sup> 2023 fault rupture trace shown as black line.

**Figure S4.** Coverage map of Sentinel-1 radar satellite imagery frames (Copernicus) used for earthquake triggered liquefaction mapping. Simplified February 6<sup>th</sup> 2023 fault rupture trace shown as black line.

**Table S1.** Frame id and dates of Copernicus Sentinel-1 SLC frames.

**Table S2.** Frame id and dates of Corona (KH-4B) declassified satellite imagery.

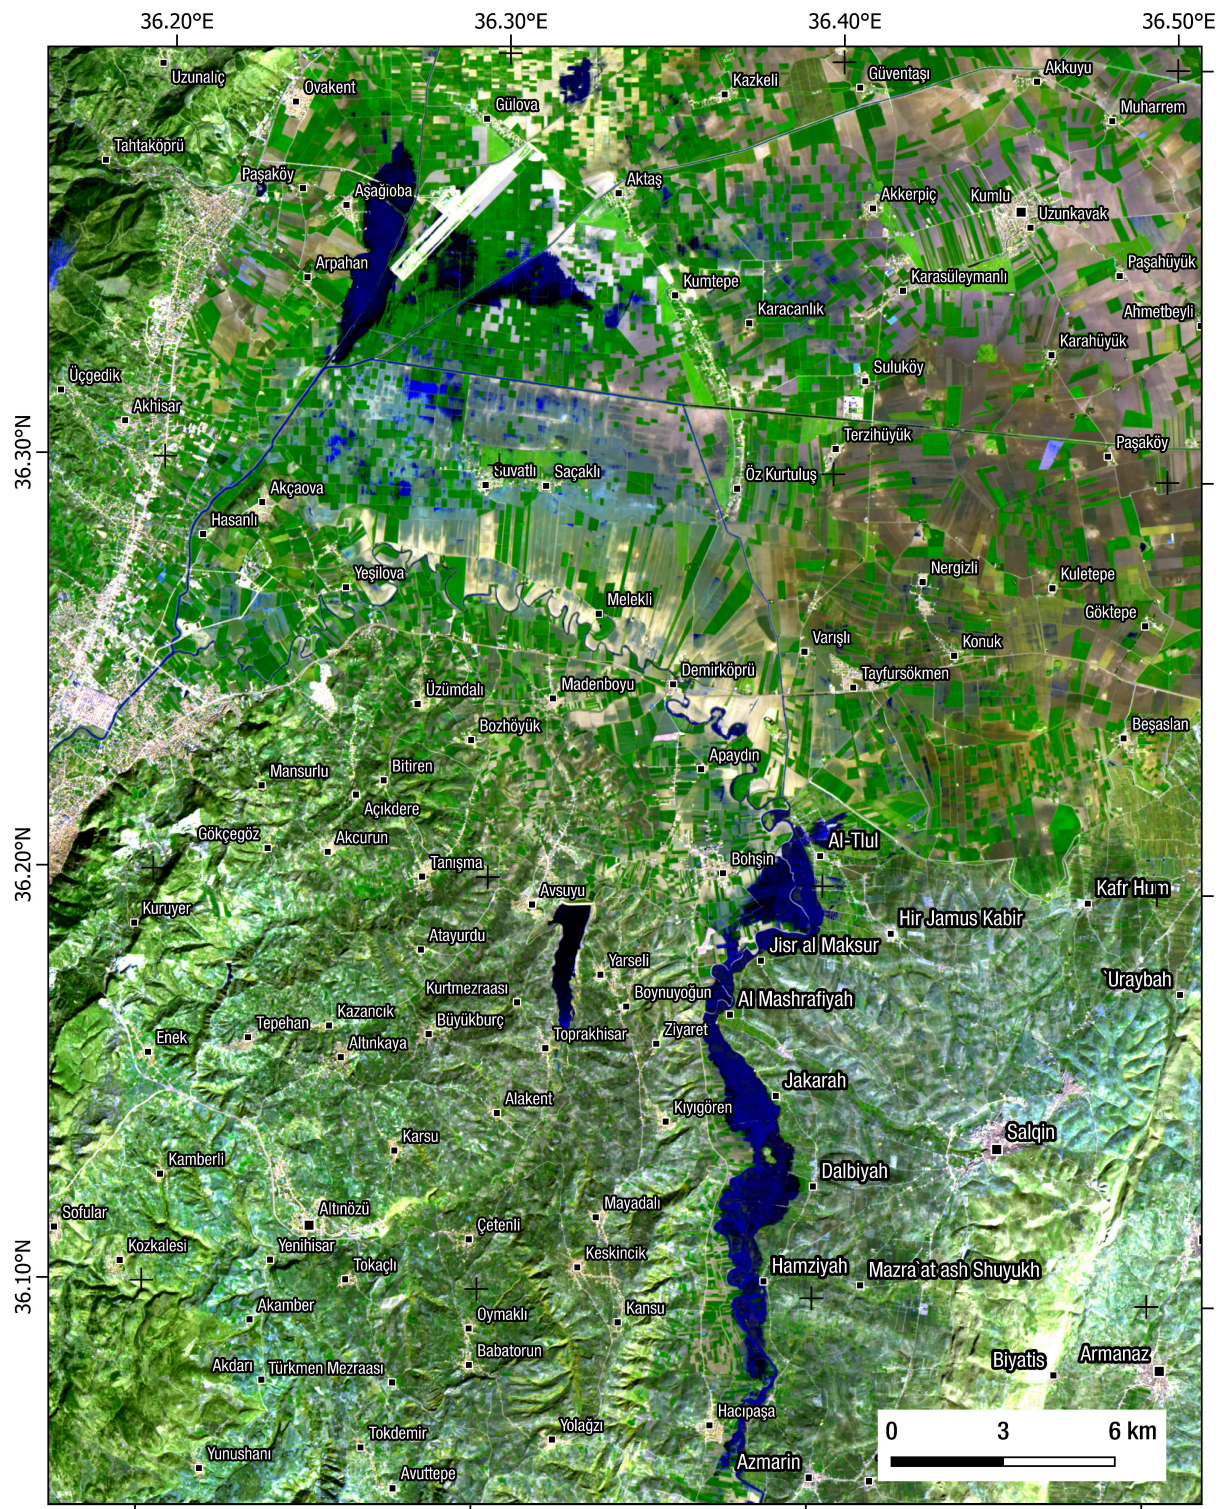

**Figure S1.** Flooded areas in Hatay province after the February 6<sup>th</sup> 2023 earthquakes. Sentinel-2 pseudo-colour RGB image (band combination B12-B11-B04) from February 12 2023. Flooded areas around Hatay airport in Amik plain and along Orontes river are shown as dark blue colour.



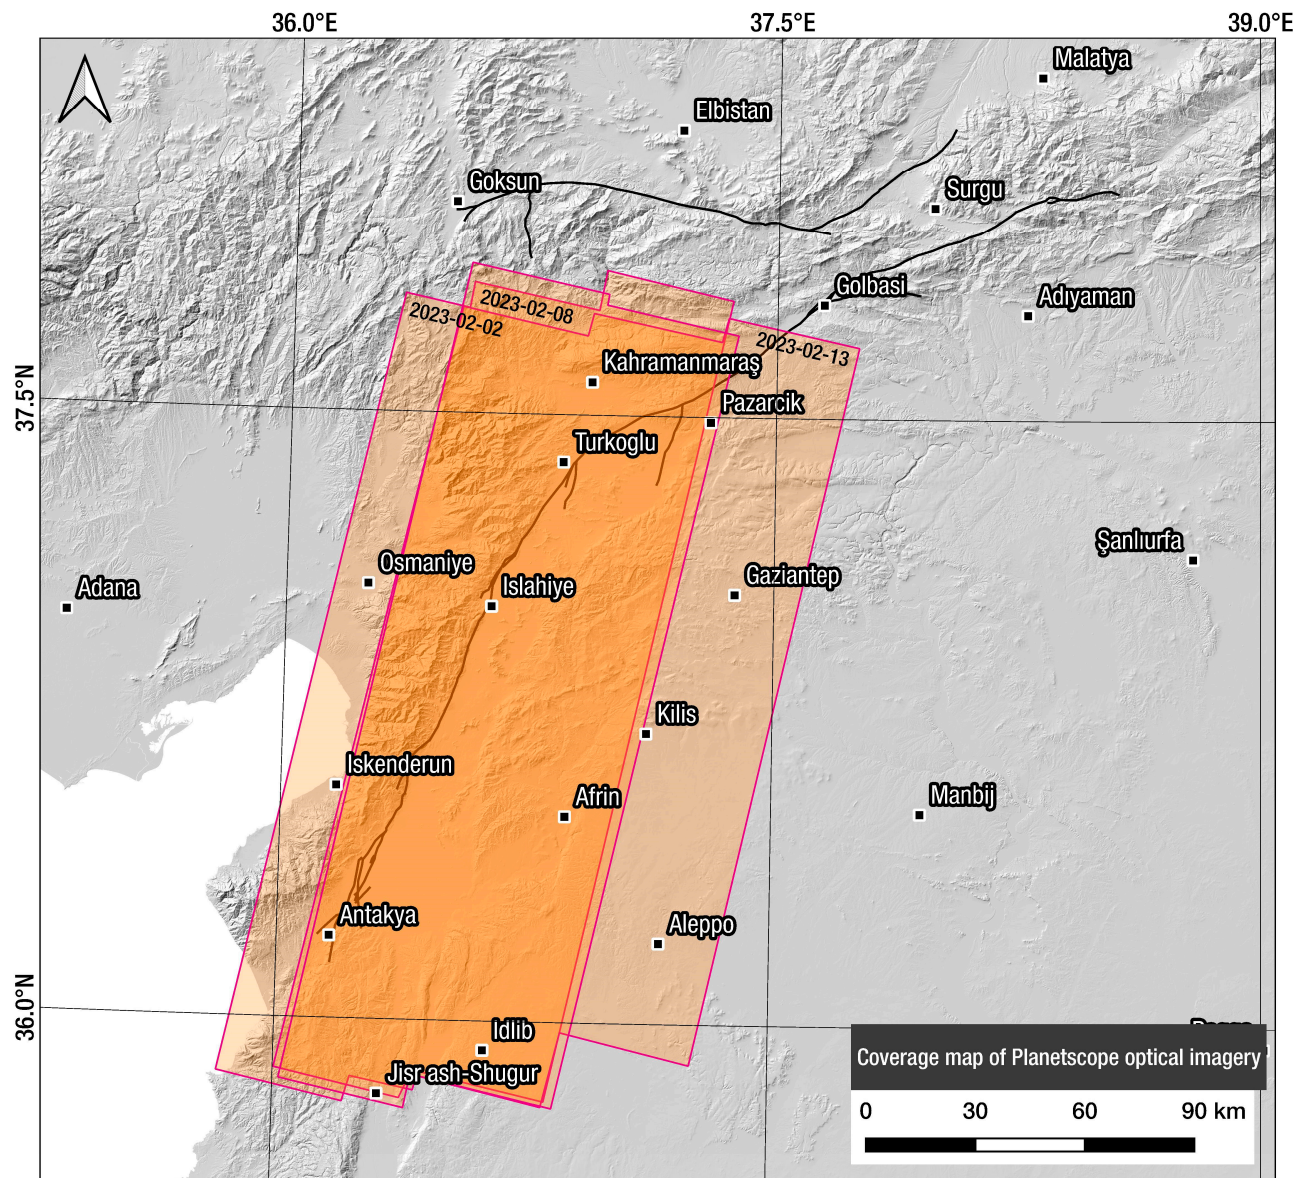

**Figure S2.** Coverage map of Planetscope optical imagery (Planet) used for earthquake triggered liquefaction mapping. Simplified February 6<sup>th</sup> 2023 fault rupture trace shown as black line.



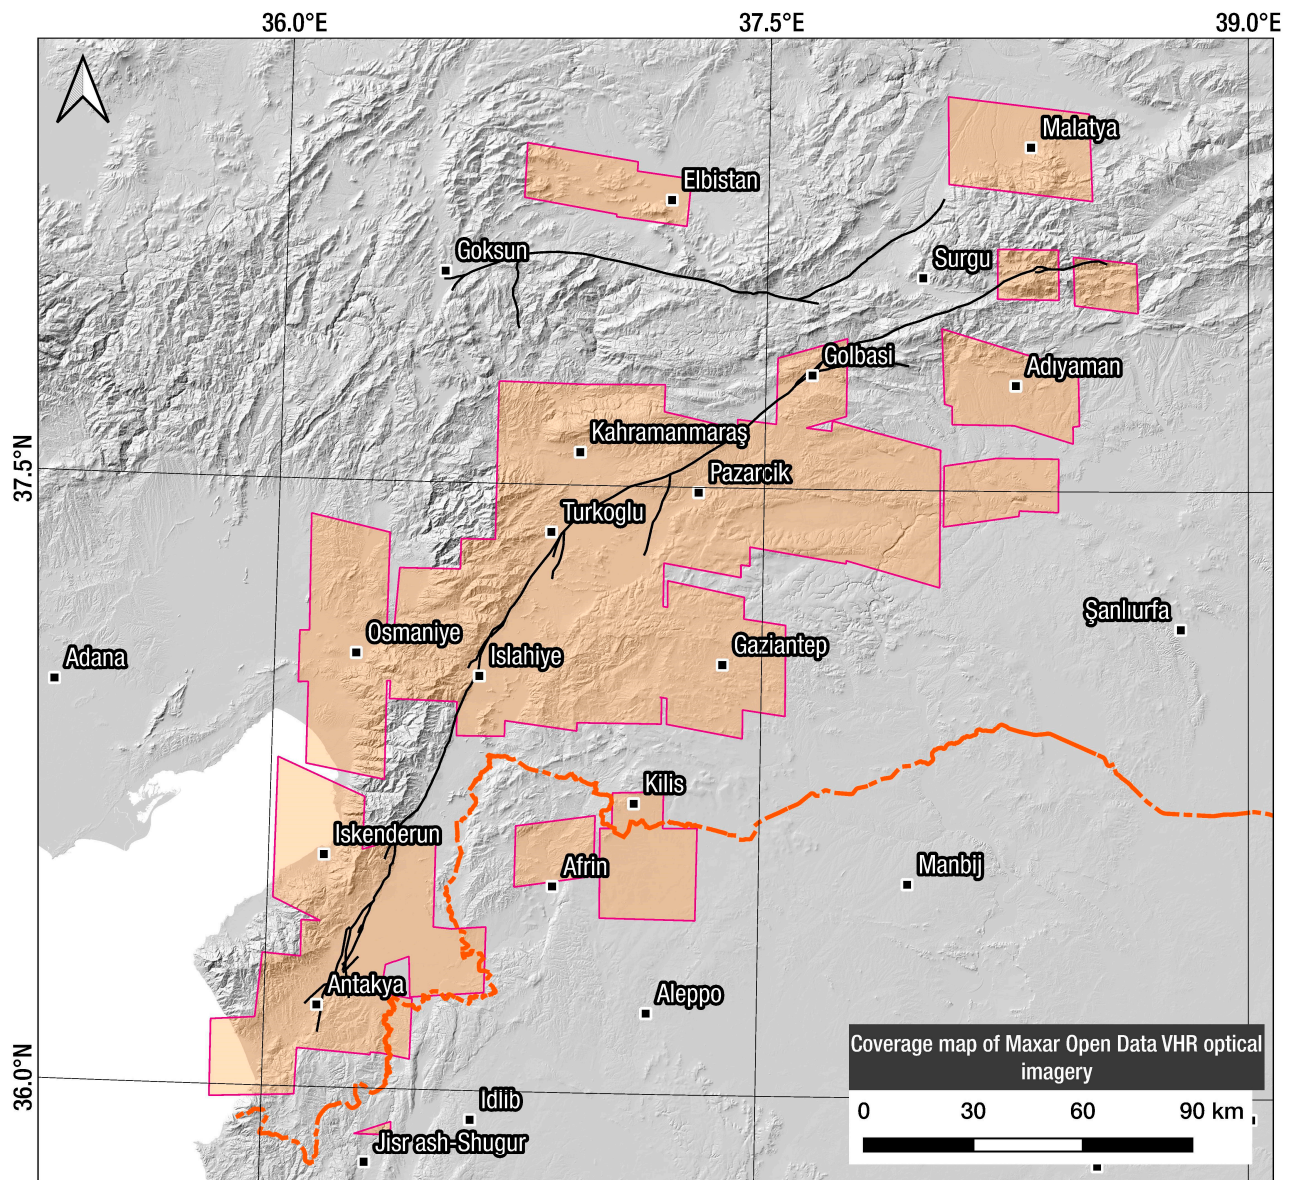

**Figure S3.** Coverage map of Very High Resolution (VHR) optical imagery (Maxar Open Data) used for earthquake triggered liquefaction mapping. Simplified February 6<sup>th</sup> 2023 fault rupture trace shown as black line.



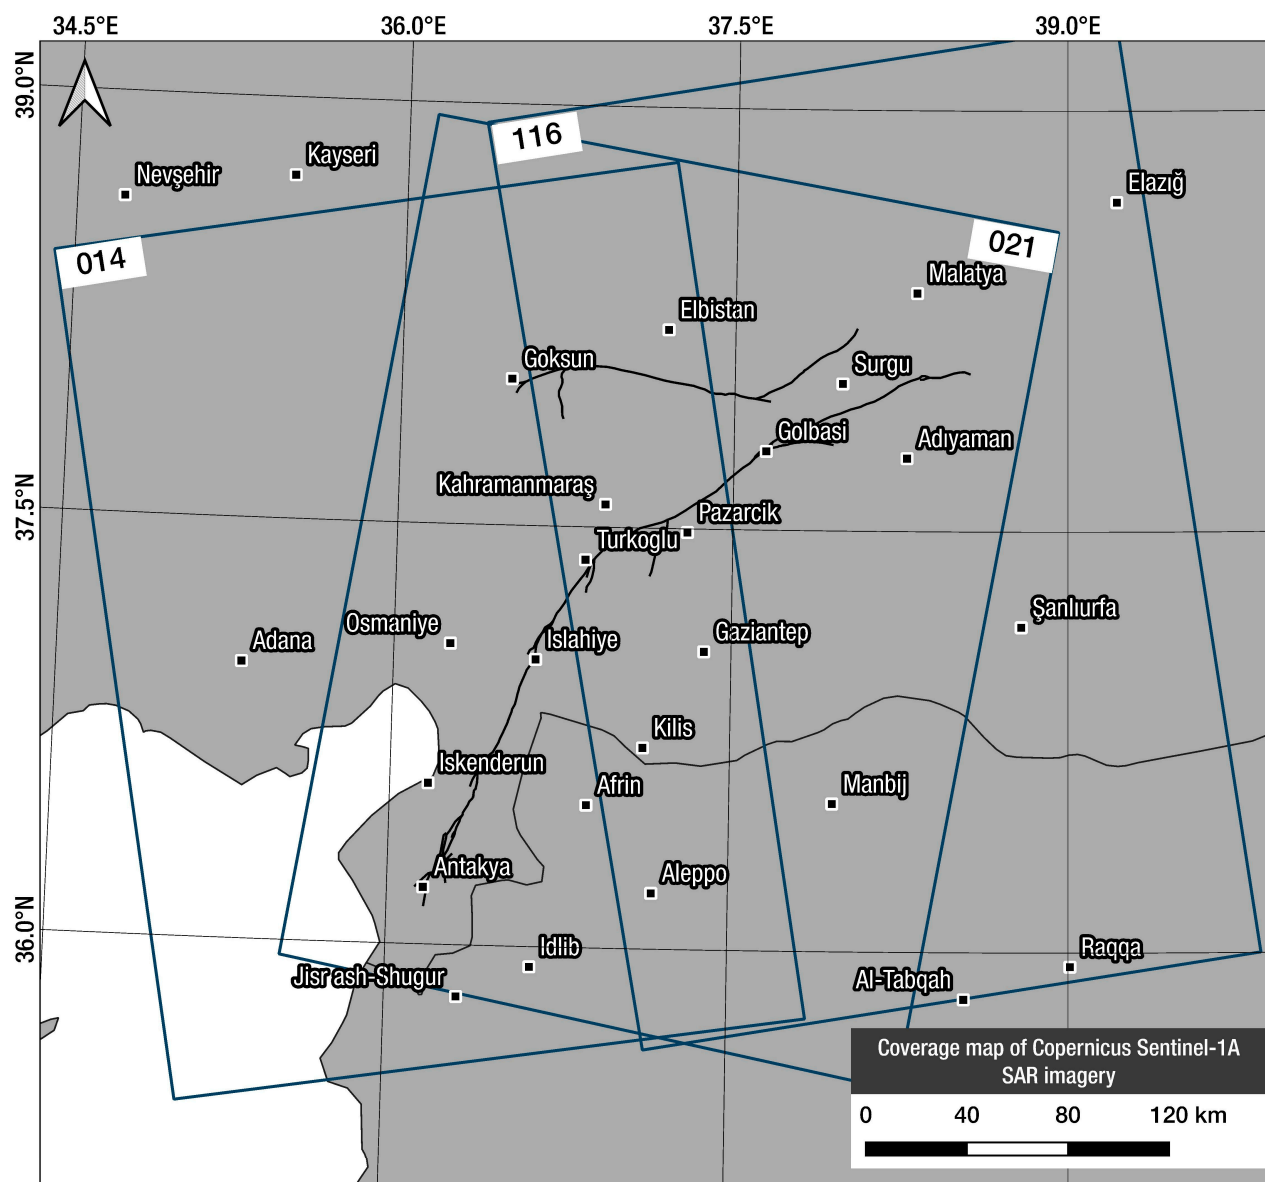

**Figure S4.** Coverage map of Sentinel-1 radar satellite imagery frames (Copernicus) used for earthquake triggered liquefaction mapping. Simplified February 6<sup>th</sup> 2023 fault rupture trace shown as black line.



**Table S1.** Frame id and dates of Copernicus Sentinel-1 SLC frames.

| Track          | Frame ID                                                            | Date of acquisition |
|----------------|---------------------------------------------------------------------|---------------------|
| 021 Descending | S1A_IW_SLC__1SDV_20230129T033427_20230129T033455_046993_05A2FE_6FF2 | 2023-01-29          |
| 021 Descending | S1A_IW_SLC__1SDV_20230129T033452_20230129T033519_046993_05A2FE_BE0B | 2023-01-29          |
| 021 Descending | S1A_IW_SLC__1SDV_20230210T033451_20230210T033518_047168_05A8CD_E5B0 | 2023-02-10          |
| 021 Descending | S1A_IW_SLC__1SDV_20230210T033426_20230210T033454_047168_05A8CD_FAA6 | 2023-02-10          |
| 014 Ascending  | S1A_IW_SLC__1SDV_20230128T153358_20230128T153426_046986_05A2B6_1629 | 2023-01-28          |
| 014 Ascending  | S1A_IW_SLC__1SDV_20230128T153424_20230128T153451_046986_05A2B6_00C8 | 2023-01-28          |
| 014 Ascending  | S1A_IW_SLC__1SDV_20230209T153357_20230209T153425_047161_05A88A_BB1A | 2023-02-09          |
| 014 Ascending  | S1A_IW_SLC__1SDV_20230209T153423_20230209T153450_047161_05A88A_9FEC | 2023-02-09          |
| 014 Ascending  | S1A_IW_SLC__1SDV_20230221T153357_20230221T153425_047336_05AE7F_B11B | 2023-02-22          |
| 014 Ascending  | S1A_IW_SLC__1SDV_20230221T153423_20230221T153450_047336_05AE7F_A71C | 2023-02-22          |
| 014 Ascending  | S1A_IW_SLC__1SDV_20230305T153357_20230305T153425_047511_05B469_C92F | 2023-03-05          |
| 014 Ascending  | S1A_IW_SLC__1SDV_20230305T153423_20230305T153450_047511_05B469_872D | 2023-03-05          |
| 116 Ascending  | S1A_IW_SLC__1SDV_20230204T152542_20230204T152609_047088_05A621_A745 | 2023-02-04          |
| 116 Ascending  | S1A_IW_SLC__1SDV_20230204T152607_20230204T152635_047088_05A621_4129 | 2023-02-04          |
| 116 Ascending  | S1A_IW_SLC__1SDV_20230216T152542_20230216T152609_047263_05AC04_9A32 | 2023-02-16          |
| 116 Ascending  | S1A_IW_SLC__1SDV_20230228T152607_20230228T152635_047438_05B1F8_D724 | 2023-02-28          |

**Table S2.** Frame id and dates of Corona (KH-4B) declassified satellite imagery.

| Frame ID      | Date of acquisition |
|---------------|---------------------|
| 1105-1009A003 | 04-11-1968          |
| 1105-1009A004 | 04-11-1968          |
| 1105-1009A005 | 04-11-1968          |
| 1105-1009A006 | 04-11-1968          |
| 1105-1009A007 | 04-11-1968          |
| 1107-112A050  | 31-07-1969          |
| 1107-112A051  | 31-07-1969          |
| 1107-112A052  | 31-07-1969          |
| 1107-112A053  | 31-07-1969          |
| 1107-112A054  | 31-07-1969          |
| 1107-2138A057 | 01-08-1969          |
| 1107-2138A058 | 01-08-1969          |
| 1107-2138A059 | 01-08-1969          |
| 1112-2203A038 | 02-12-1970          |
| 1112-2203A039 | 02-12-1970          |
| 1112-2203A040 | 02-12-1970          |
| 1112-2203A041 | 02-12-1970          |
